# Supplementary material
Source: publisher figshare collection journal article supplement (https://acs.figshare.com/ndownloader/files/4158229)
Supplement: Supplementary file 1 [file 4158229]

## Simultaneous Enhancement of Cell Proliferation and Thermally Induced Harvest Efficiency Based on Temperature-Responsive Cationic Copolymer-Grafted Microcarriers

Atsushi Tamura,<sup>1</sup> Masanori Nishi,<sup>1,2</sup> Jun Kobayashi,<sup>1</sup> Kenichi Nagase,<sup>1</sup> Hirofumi Yajima,<sup>2</sup>  
Masayuki Yamato,<sup>1</sup> and Teruo Okano\*,<sup>1</sup>

<sup>1</sup> Institute of Advanced Biomedical Engineering and Science, Tokyo Women's Medical University (TWIns), and Global Center of Excellence (COE), 8-1 Kawadacho, Shinjuku, Tokyo 162-8666, Japan.

<sup>2</sup> Department of Applied Chemistry, Tokyo University of Science, 12-1 Funagawara-cho, Ichigaya, Shinjuku, Tokyo 162-0826, Japan.

\* Corresponding author. Prof. Teruo Okano

(Phone: +81-3-5367-9945 (ext. 6201), Fax: +81-3-3359-6046, E-mail: tokano@abmes.twmu.ac.jp)

### S1. Dispersion property of copolymer-grafted beads

Two milligrams of copolymer-grafted beads (surface area: 2 cm<sup>2</sup>) was added to the non-adhesive 12-well plate (HydroCell), and 1 mL of medium (Ham F12 containing 10% FBS) was added to each well. After incubation for 24 and 72 h at 37 °C, the beads were imaged by a phase contrast microscope.

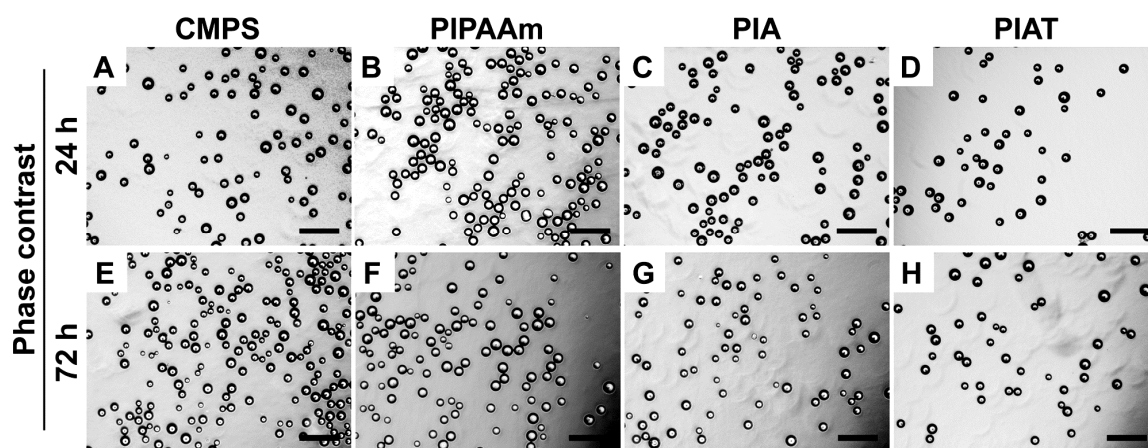

**Figure S1.** Phase contrast microscopic images of unmodified CMPS (A, E), PIPAAm homopolymer- (B, F), PIA bipolymer- (C, G), and PIAT terpolymer-grafted beads (D, H) after the incubation for 24 h (A-D) and 72 h (E-H) without cells (scale bars: 200  $\mu$ m).

## S2. Protein adsorption on the surface of temperature-responsive copolymer-grafted beads

Adsorption of fluorescein isothiocyanate-modified bovine serum albumin (FITC-BSA) (Sigma-Aldrich) on the surface of temperature-responsive copolymer-grafted beads was demonstrated at 37 °C to evaluate the anionic protein adhesiveness of the surfaces. An FITC-BSA in phosphate buffered saline (PBS) (Sigma-Aldrich) (50 µg/mL) was incubated with beads (10 mg) in a non-adhesive 24-well plate (HydroCell) at 37 °C for 2 h. The supernatant of incubated FITC-BSA solution was collected, and its fluorescence intensity was measured with an FP-6500 spectrofluorimeter (Jasco, Tokyo, Japan). The amount of adsorbed FITC-BSA on the surfaces was estimated from the reduction in fluorescence intensity of FITC-BSA in the supernatant. The FITC-BSA adsorbed on the surface of beads was observed using a fluorescent microscope (Eclipse TE2000-U) (Nikon) with the appropriate filter sets.

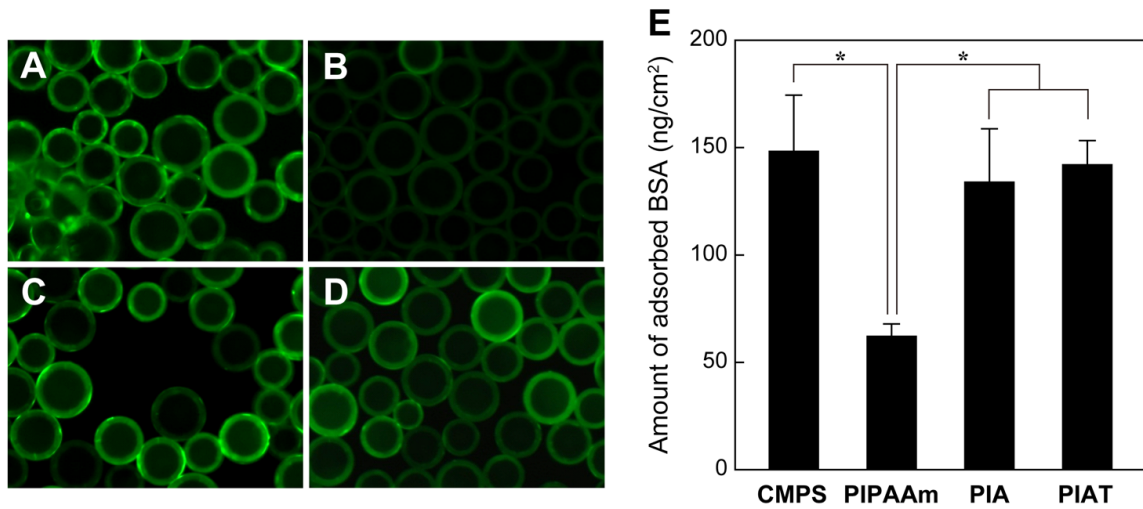

**Figure S2.** Fluorescence microscopic images of FITC-BSA (green) adsorbed on the surface of unmodified CMPS (A), PIPAAm homopolymer- (B), PIA bipolymer- (C), and PIAT terpolymer-grafted beads (D) after 2 h incubation at 37 °C. (E) Amount of adsorbed FITC-BSA on each bead surface after incubation with FITC-BSA (50 µg/mL) for 2 h at 37 °C. The data are expressed as the means ± S.D. of triplicate experiments (\* $p < 0.05$ ).
